# Supplementary material
Source: publisher figshare collection journal article supplement (https://frontiersin.figshare.com/ndownloader/files/12382172)

Figure S3. Phylogenic analyses of MADS-box genes from *K. japonica* and represented MADS-box genes from other eudicots.

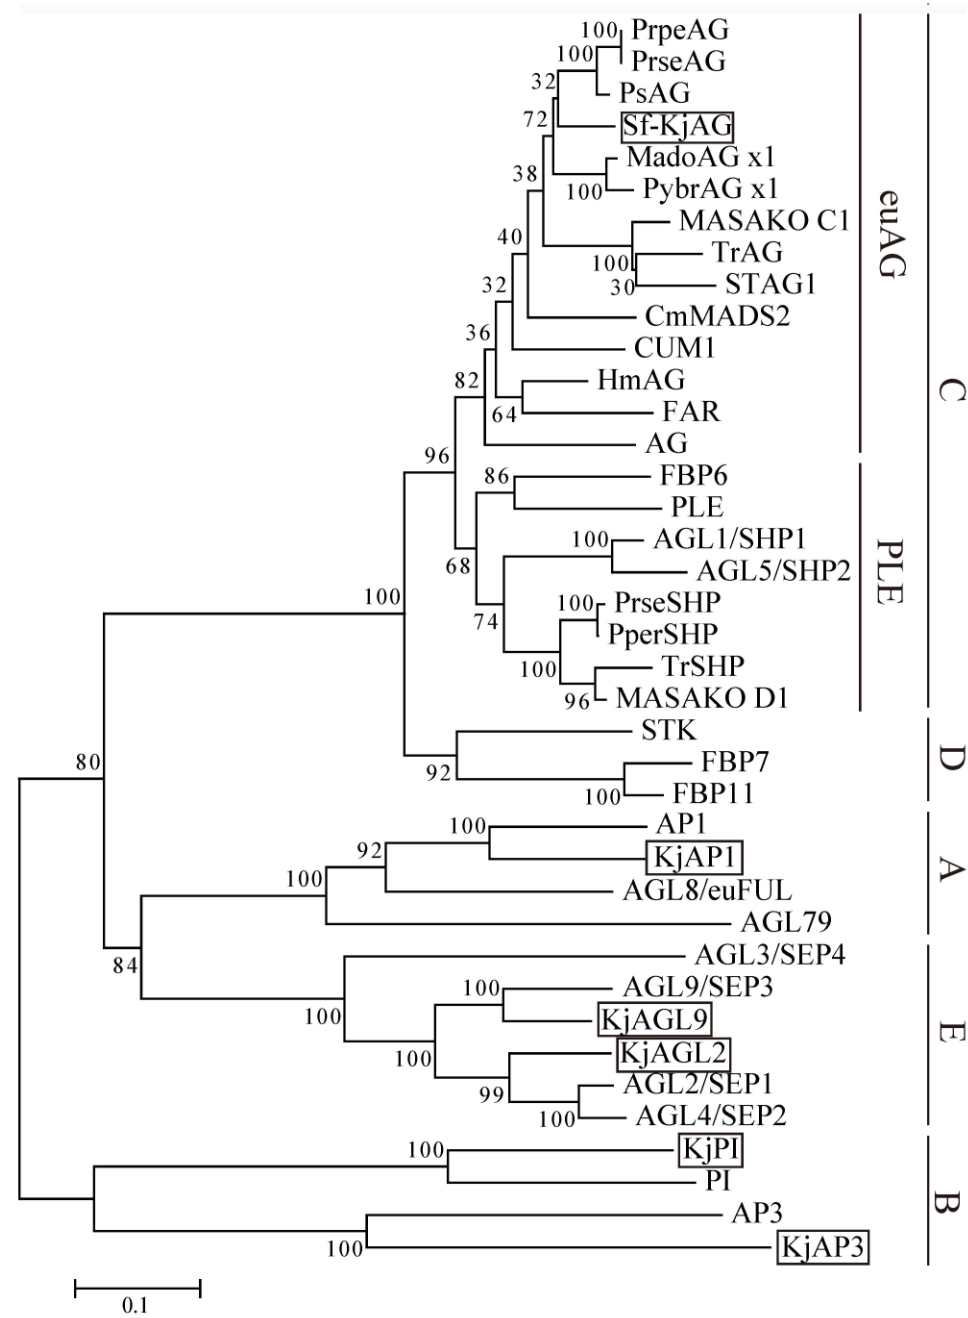

Supplement: Supplementary file [file 12382172]
